# Supplementary material
Source: PubMed Central journal article supplement (PMC7966246)
Supplement: 4002_table.pdf [file 4002_table.pdf]

**On-line Table: Standardized MRI characteristics of 22 ependymoblastoma cases**

| Patient No. | Year | Age at Diagnosis (y) | Sex | Tumor Localization      | Diameter CC (cm) | Diameter LR (cm) | Diameter AP (cm) | Tumor Volume (cm <sup>3</sup> ) | Cysts | Periphery Cysts | Cysts Size | Hemorrhage | Signal Homogeneity <sup>a</sup> | Well-Defined Tumor Margin | T2 Signal | T2 Predominant T2 Signal | Edema | Edema Volume (cm <sup>3</sup> ) | T1 Signal | T1 Predominant T1 Signal | Contrast Intensity | Contrast Homogeneity | % Enhancement (Solid Tumor) | Sialic Acid Measurement Provided | CHS Dissection (Stages) | Diffusion Restriction (DWI) | Confirmed By Low ADC | MR Spectroscopy Provided | CT Scan Provided | Calculations |    |
|-------------|------|----------------------|-----|-------------------------|------------------|------------------|------------------|---------------------------------|-------|-----------------|------------|------------|---------------------------------|---------------------------|-----------|--------------------------|-------|---------------------------------|-----------|--------------------------|--------------------|----------------------|-----------------------------|----------------------------------|-------------------------|-----------------------------|----------------------|--------------------------|------------------|--------------|----|
| 1           | 2008 | 183                  | F   | Frontal cortex          | 4.4              | 4.3              | 5.2              | 49                              | No    | No              | —          | Yes        | PI                              | >90%                      | All       | ↑                        | No    | —                               | ↓         | Strong                   | PH                 | PH                   | 26%–30%                     | Yes                              | —                       | —                           | —                    | No                       | No               | —            |    |
| 2           | 2012 | 2                    | M   | Frontal cortex          | 3.5              | 3.1              | 3                | 16                              | No    | No              | —          | No         | PI                              | >90%                      | All       | ↑                        | No    | —                               | ↓         | —                        | —                  | —                    | —                           | —                                | Yes                     | Yes                         | —                    | Yes                      | No               | —            |    |
| 3           | 2012 | 0.33                 | M   | Cerebellum              | 3.9              | 5.7              | 6.7              | 75                              | No    | No              | —          | No         | I                               | >90%                      | All       | ↑                        | No    | —                               | ↓         | Mild                     | PH                 | PH                   | 26%–50%                     | Inc.                             | —                       | Yes                         | —                    | No                       | No               | —            |    |
| 4           | 2012 | 1                    | F   | Fourth ventricle        | 3.6              | 3.5              | 3.8              | 24                              | No    | No              | —          | Yes        | PI                              | 50%–90%                   | All       | ↑                        | No    | —                               | ↓         | Mild                     | PH                 | PH                   | 26%–50%                     | Inc.                             | M3                      | Yes                         | Yes                  | No                       | No               | —            |    |
| 5           | 2012 | 2.92                 | M   | Frontal cortex          | 5                | 3                | 4                | 30                              | Yes   | Yes             | <1cm       | No         | PI                              | 50%–90%                   | All       | ↔                        | No    | —                               | ↔         | ↔                        | —                  | —                    | —                           | Yes                              | Yes                     | —                           | No                   | No                       | —                |              |    |
| 6           | 2012 | 1.92                 | F   | Parietal cortex         | 7.5              | 7.5              | 10.5             | 281                             | Yes   | Yes             | <1cm       | Yes        | I                               | 50%–90%                   | All       | ↔                        | Yes   | 1                               | All       | ↔                        | Moderate           | PH                   | PH                          | 26%–50%                          | No                      | —                           | Yes                  | No                       | No               | —            |    |
| 7           | 2012 | 1                    | F   | Fourth ventricle        | 4.6              | 4.3              | 3.8              | 38                              | Yes   | No              | <1cm       | Yes        | PI                              | >90%                      | All       | ↔                        | No    | —                               | All       | ↓                        | —                  | —                    | —                           | Yes                              | Yes                     | —                           | No                   | No                       | —                |              |    |
| 8           | 2013 | 2.92                 | M   | Parietal cortex         | 4.2              | 3.8              | 3.2              | 26                              | No    | No              | —          | Yes        | PI                              | >90%                      | All       | ↔                        | No    | —                               | All       | ↔                        | —                  | —                    | —                           | Yes                              | Yes                     | —                           | Yes                  | No                       | —                |              |    |
| 9           | 2012 | 2.42                 | M   | Frontal cortex          | 7.5              | 10.2             | 9.2              | 352                             | No    | No              | —          | Yes        | H                               | >90%                      | All       | ↑                        | No    | —                               | ↓         | Moderate                 | PH                 | PH                   | 1%–25%                      | Inc.                             | —                       | Yes                         | —                    | No                       | No               | —            |    |
| 10          | 2009 | 1.83                 | F   | Parietal cortex         | 7                | 6.5              | 8                | 182                             | Yes   | No              | <1cm       | Yes        | PH                              | >90%                      | All       | ↑                        | No    | —                               | ↓         | Moderate                 | PH                 | PH                   | 1%–25%                      | Yes                              | —                       | —                           | —                    | No                       | No               | —            |    |
| 11          | 2008 | 2.25                 | F   | ST related to ventricle | 5.5              | 4.8              | 6.9              | 91                              | Yes   | No              | <1cm       | Yes        | I                               | >90%                      | All       | ↑                        | No    | —                               | ↔         | ↔                        | Mild               | PH                   | PH                          | 1%–25%                           | Yes                     | —                           | Yes                  | Yes                      | No               | —            |    |
| 12          | 2005 | 2.33                 | M   | Frontal cortex          | 5.8              | 5.9              | 6.1              | 104                             | Yes   | Yes             | >1cm       | Yes        | PI                              | >90%                      | All       | ↔                        | No    | —                               | ↔         | ↔                        | Moderate           | PH                   | PH                          | 26%–30%                          | Inc.                    | M2+M3                       | Yes                  | —                        | No               | Yes          | No |
| 13          | 2005 | 2.33                 | M   | Parietal cortex         | 7.5              | 7                | 8.4              | 221                             | Yes   | Yes             | <1cm       | Yes        | I                               | >90%                      | All       | ↔                        | No    | —                               | ↓         | Mild                     | H                  | H                    | 1%–25%                      | Inc.                             | —                       | —                           | —                    | No                       | No               | —            |    |
| 14          | 2004 | 2.5                  | M   | ST ventricle            | 5.7              | 6.7              | 7.7              | 147                             | No    | No              | —          | Yes        | I                               | >90%                      | All       | ↑                        | No    | —                               | All       | ↔                        | Moderate           | PH                   | PH                          | 1%–25%                           | Inc.                    | —                           | —                    | No                       | Yes              | Yes          | —  |
| 15          | 2005 | 3.42                 | M   | Parietal cortex         | 1.9              | 1.9              | 1.8              | 3                               | No    | No              | —          | No         | PH                              | >90%                      | ↔         | ↔                        | No    | —                               | ↔         | ↔                        | —                  | —                    | —                           | Inc.                             | —                       | Yes                         | —                    | No                       | No               | —            |    |
| 16          | 2002 | 0.25                 | F   | Fourth ventricle        | 6.6              | 3.4              | 3.7              | 42                              | Yes   | No              | <1cm       | Yes        | I                               | >90%                      | All       | ↔                        | No    | —                               | ↔         | ↔                        | Moderate           | PI                   | PI                          | 51%–75%                          | Inc.                    | M2+M3                       | —                    | —                        | No               | No           | —  |
| 17          | 2008 | 1.33                 | M   | Brainstem               | 6.5              | 3.4              | 3.8              | 42                              | No    | No              | —          | No         | H                               | >90%                      | ↔         | ↔                        | No    | —                               | ↓         | Strong                   | PH                 | PH                   | 1%–25%                      | Inc.                             | M3                      | Yes                         | Yes                  | No                       | Yes              | No           |    |
| 18          | 2005 | 1.92                 | M   | Brainstem               | 3.2              | 3.2              | 3.1              | 32                              | No    | No              | —          | Yes        | PH                              | >90%                      | ↑         | ↑                        | No    | —                               | ↓         | Mild                     | PH                 | PH                   | 1%–25%                      | Inc.                             | —                       | —                           | —                    | No                       | No               | —            |    |
| 19          | 2008 | 3.16                 | M   | Parietal cortex         | 8.4              | 6.7              | 9.3              | 262                             | Yes   | Yes             | >1cm       | Yes        | I                               | >90%                      | All       | ↑                        | No    | —                               | All       | ↓                        | Mild               | PH                   | PH                          | 1%–25%                           | Yes                     | —                           | —                    | No                       | Yes              | Yes          | —  |
| 20          | 2010 | 2.92                 | F   | ST ventricle            | 6.4              | 6.9              | 6.7              | 148                             | No    | No              | —          | Yes        | PI                              | >90%                      | All       | ↔                        | No    | —                               | ↓         | Strong                   | PI                 | PI                   | 26%–50%                     | Yes                              | —                       | Yes                         | Yes                  | No                       | Yes              | Yes          |    |
| 21          | 2013 | 2.92                 | M   | Parietal cortex         | 7.3              | 6.8              | 9.3              | 231                             | Yes   | Yes             | <1cm       | Yes        | I                               | >90%                      | All       | ↔                        | No    | —                               | All       | ↔                        | Moderate           | I                    | I                           | 1%–25%                           | No                      | —                           | Yes                  | Yes                      | No               | No           | —  |
| 22          | 2013 | 3.42                 | M   | Frontal cortex          | 6.1              | 6.8              | 6.2              | 129                             | Yes   | Yes             | <1cm       | Yes        | PI                              | >90%                      | All       | ↑                        | Yes   | 0.8                             | All       | ↓                        | Moderate           | PH                   | PH                          | 26%–50%                          | Inc.                    | —                           | —                    | No                       | No               | No           | —  |

**Note:**—All indicates all intensities present; AP, anteroposterior; CC, craniocaudal; H, homogeneous; I, inhomogeneous; Inc., incomplete; PH, predominantly homogeneous; PI, predominantly inhomogeneous; LR, left-right; ST, supratentorial; hyperintense; ↔, isointense; ↓, hypointense; —, not applicable.  
<sup>a</sup> In T1WI and T2WI.
